# Supplementary material for: Digital scoring of EpCAM and slug expression as prognostic markers in head and neck squamous cell carcinomas
Source: PubMed Central journal article supplement (PMC8024715; doi:10.1002/1878-0261.12886), 2020-12-29
Supplement: MOL2-15-1040-s001.pdf [file MOL2-15-1040-s001.pdf]

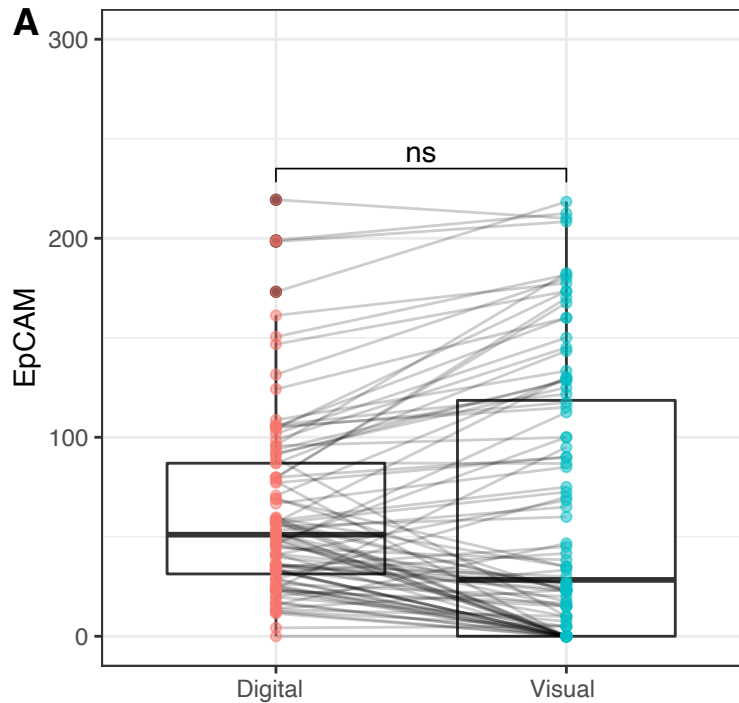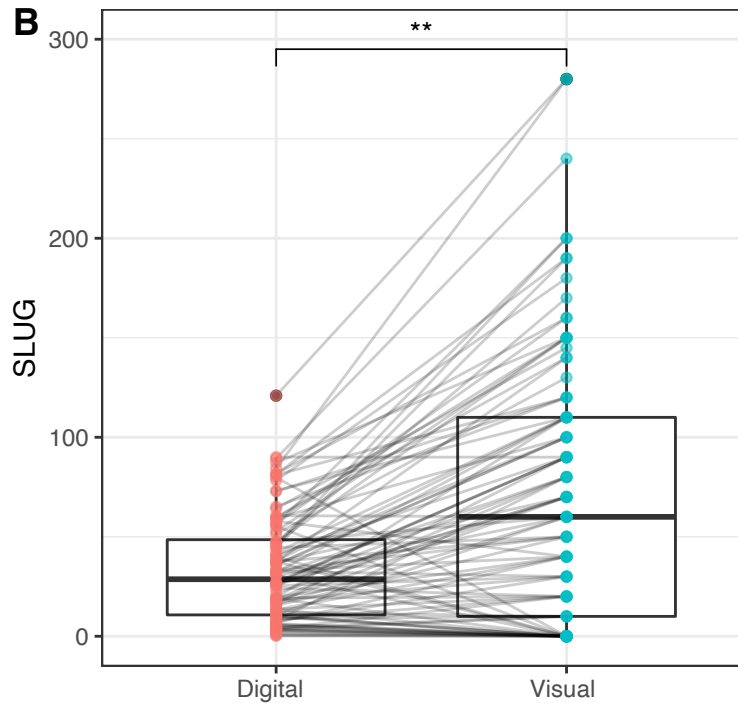

**Supplementary Figure 1**
