# Supplementary material for: Digital scoring of EpCAM and slug expression as prognostic markers in head and neck squamous cell carcinomas
Source: PubMed Central journal article supplement (PMC8024715; doi:10.1002/1878-0261.12886), 2020-12-29
Supplement: MOL2-15-1040-s002.pdf [file MOL2-15-1040-s002.pdf]

## OS

| ClinPara  | ID  | HR       | Lower_CI   | Upper_CI   | p        | signif |
|-----------|-----|----------|------------|------------|----------|--------|
| T-Status  | 2   | 0,696704 | 0,22440664 | 2,16302249 | 0,531822 |        |
| T-Status  | 3   | 1,140293 | 0,36742873 | 3,53883147 | 0,820263 |        |
| T-Status  | 4   | 2,790001 | 0,88269394 | 8,81857528 | 0,080558 | .      |
| N-Status  | 1   | 0,699038 | 0,25399753 | 1,92385529 | 0,488195 |        |
| N-Status  | 2   | 1,667912 | 0,78324822 | 3,55178685 | 0,184678 |        |
| N-Status  | 3   | 4,097342 | 0,87953745 | 19,0875452 | 0,072421 | .      |
| R-Status  | 1   | 0,579845 | 0,2558164  | 1,31430335 | 0,191774 |        |
| R-Status  | NA  | 3,34E-08 | 0          | Inf        | 0,99654  |        |
| Pn-Status | 1   | 1,528731 | 0,71950258 | 3,24810441 | 0,269667 |        |
| Pn-Status | NA  | 0,682753 | 0,30205828 | 1,54325074 | 0,359053 |        |
| L-Status  | 1   | 2,675225 | 1,35600955 | 5,27786025 | 0,004534 | **     |
| L-Status  | NA  | 1,940487 | 0,66440317 | 5,66747579 | 0,225402 |        |
| Grading   | 2   | 1,136408 | 0,15120112 | 8,54109389 | 0,901113 |        |
| Grading   | 3   | 0,677924 | 0,09063739 | 5,07054558 | 0,704959 |        |
| ECE       | yes | 1,953042 | 0,87356517 | 4,3664414  | 0,102959 |        |
| ECE       | NA  | 1,28E-07 | 0          | Inf        | 0,996879 |        |
| ECE       | no  | 1,032937 | 0,4585963  | 2,3265761  | 0,937652 |        |
| HPV       | pos | 0,254618 | 0,07832947 | 0,82766358 | 0,022939 | *      |
| EpCAM.Dig |     | 0,784439 | 0,51572849 | 1,19315536 | 0,256527 |        |
| SLUG.Dig  |     | 2,048215 | 1,18304142 | 3,54610168 | 0,010462 | *      |
| EpCAM.Vis |     | 0,709456 | 0,53244721 | 0,94531103 | 0,019077 | *      |
| SLUG.Vis  |     | 1,142561 | 0,91016386 | 1,43429739 | 0,250696 | .      |

## RFS

| ClinPara  | ID  | HR       | Lower_CI   | Upper_CI   | p        | signif |
|-----------|-----|----------|------------|------------|----------|--------|
| T-Status  | 2   | 0,775766 | 0,25255155 | 2,38292798 | 0,657447 |        |
| T-Status  | 3   | 1,192831 | 0,384314   | 3,70229796 | 0,760266 |        |
| T-Status  | 4   | 3,247779 | 1,0388199  | 10,1538979 | 0,042821 | *      |
| N-Status  | 1   | 0,748191 | 0,2899395  | 1,93071182 | 0,548655 |        |
| N-Status  | 2   | 1,506382 | 0,72396745 | 3,13437817 | 0,273104 |        |
| N-Status  | 3   | 3,488718 | 0,75892079 | 16,0374451 | 0,10838  |        |
| R-Status  | 1   | 0,627604 | 0,28979445 | 1,35919414 | 0,237378 |        |
| R-Status  | NA  | 3,4E-08  | 0          | Inf        | 0,996454 |        |
| Pn-Status | 1   | 1,491205 | 0,70178089 | 3,16864392 | 0,298769 |        |
| Pn-Status | NA  | 0,875013 | 0,4116258  | 1,86005629 | 0,728584 |        |
| L-Status  | 1   | 2,728058 | 1,38298475 | 5,38133284 | 0,003786 | **     |
| L-Status  | NA  | 3,076473 | 1,23565972 | 7,6596227  | 0,015751 | *      |
| Grading   | 2   | 1,122412 | 0,14940717 | 8,43204232 | 0,910634 |        |
| Grading   | 3   | 0,743231 | 0,09986086 | 5,53161561 | 0,771999 |        |
| ECE       | yes | 1,812144 | 0,82806969 | 3,96568985 | 0,136796 |        |
| ECE       | NA  | 1,23E-07 | 0          | Inf        | 0,996726 |        |
| ECE       | no  | 0,993574 | 0,45600529 | 2,16486325 | 0,987055 |        |
| HPV       | pos | 0,236826 | 0,07302067 | 0,76809339 | 0,016418 | *      |
| EpCAM.Dig |     | 0,907137 | 0,61606842 | 1,33572449 | 0,621534 |        |
| SLUG.Dig  |     | 1,99339  | 1,13594061 | 3,49807412 | 0,016209 | *      |
| EpCAM.Vis |     | 0,796501 | 0,61080886 | 1,03864628 | 0,09296  | .      |
| SLUG.Vis  |     | 1,129405 | 0,89885437 | 1,41909087 | 0,296205 | .      |

## LR-RFS

| ClinPara  | ID  | HR       | Lower_CI  | Upper_CI  | p        | signif |
|-----------|-----|----------|-----------|-----------|----------|--------|
| T-Status  | 2   | 0,757716 | 0,246658  | 2,3276519 | 0,628014 |        |
| T-Status  | 3   | 1,144133 | 0,3684944 | 3,5524053 | 0,815816 |        |
| T-Status  | 4   | 3,135018 | 1,0014215 | 9,8143861 | 0,049716 | *      |
| N-Status  | 1   | 0,76333  | 0,2958298 | 1,9696208 | 0,576566 |        |
| N-Status  | 2   | 1,525038 | 0,7331309 | 3,1723388 | 0,258779 |        |
| N-Status  | 3   | 3,86218  | 0,8386003 | 17,787299 | 0,082905 | .      |
| R-Status  | 1   | 0,640296 | 0,2956581 | 1,3866641 | 0,258138 |        |
| R-Status  | NA  | 3,42E-08 | 0         | Inf       | 0,996444 |        |
| Pn-Status | 1   | 1,50409  | 0,7078968 | 3,1957845 | 0,288439 |        |
| Pn-Status | NA  | 0,880068 | 0,4139057 | 1,8712464 | 0,739939 |        |
| L-Status  | 1   | 2,763916 | 1,4014938 | 5,4507791 | 0,003345 | **     |
| L-Status  | NA  | 3,032241 | 1,2195296 | 7,5393704 | 0,016985 | *      |
| Grading   | 2   | 1,095764 | 0,1458449 | 8,2327117 | 0,929177 |        |
| Grading   | 3   | 0,709193 | 0,0952679 | 5,279367  | 0,737246 |        |
| ECE       | yes | 1,854338 | 0,847595  | 4,0568553 | 0,122105 |        |
| ECE       | NA  | 1,25E-07 | 0         | Inf       | 0,996725 |        |
| ECE       | no  | 1,008232 | 0,4628084 | 2,1964437 | 0,983535 |        |
| HPV       | pos | 0,238122 | 0,0734274 | 0,7722168 | 0,016821 | *      |
| EpCAM.Dig |     | 0,87978  | 0,5976759 | 1,2950389 | 0,516139 |        |
| SLUG.Dig  |     | 2,048435 | 1,1646972 | 3,6027264 | 0,012803 | *      |
| EpCAM.Vis |     | 0,782027 | 0,6008723 | 1,0177962 | 0,067436 | .      |
| SLUG.Vis  |     | 1,137296 | 0,9041697 | 1,4305293 | 0,271665 | .      |

## DSS

| ClinPara  | ID  | HR       | Lower_CI  | Upper_CI  | p        | signif |
|-----------|-----|----------|-----------|-----------|----------|--------|
| T-Status  | 2   | 0,576713 | 0,1117361 | 2,9766415 | 0,51098  |        |
| T-Status  | 3   | 1,11578  | 0,2251017 | 5,530677  | 0,893294 |        |
| T-Status  | 4   | 2,158085 | 0,4180329 | 11,141066 | 0,358355 |        |
| N-Status  | 1   | 0,468362 | 0,0908444 | 2,4147144 | 0,364699 |        |
| N-Status  | 2   | 1,490183 | 0,5088249 | 4,3642602 | 0,466867 |        |
| N-Status  | 3   | 3,030394 | 0,351454  | 26,129414 | 0,313144 |        |
| R-Status  | 1   | 0,338447 | 0,0777962 | 1,4723926 | 0,148677 |        |
| R-Status  | NA  | 3E-08    | 0         | Inf       | 0,997756 |        |
| Pn-Status | 1   | 1,402121 | 0,487002  | 4,0368287 | 0,531028 |        |
| Pn-Status | NA  | 0,330965 | 0,0733484 | 1,4933936 | 0,15035  |        |
| L-Status  | 1   | 2,610121 | 0,9908755 | 6,8754651 | 0,052208 | .      |
| L-Status  | NA  | 0,978437 | 0,1251521 | 7,6494005 | 0,983424 |        |
| Grading   | 2   | 0,622325 | 0,0790882 | 4,8969113 | 0,652258 |        |
| Grading   | 3   | 0,231822 | 0,0282572 | 1,9018647 | 0,173415 |        |
| ECE       | yes | 2,169349 | 0,7259826 | 6,4823505 | 0,165564 |        |
| ECE       | NA  | 1,01E-07 | 0         | Inf       | 0,998128 |        |
| ECE       | no  | 0,574912 | 0,1543384 | 2,1415497 | 0,409378 |        |
| HPV       | pos | 3,57E-09 | 0         | Inf       | 0,997791 |        |
| EpCAM.Dig |     | 1,120209 | 0,6789113 | 1,848354  | 0,656841 |        |
| SLUG.Dig  |     | 2,793586 | 1,3060819 | 5,9752162 | 0,008089 | **     |
| EpCAM.Vis |     | 0,860351 | 0,591791  | 1,2507871 | 0,430779 | .      |
| SLUG.Vis  |     | 1,202933 | 0,8778413 | 1,648415  | 0,250382 | .      |
